# Supplementary material for: The propagation of the thermal spin transition of [Fe(btr)2(NCS)2]·H2O single crystals, observed by optical microscopy
Source: Royal Society of Chemistry journal article supplement (doi:10.1039/c1nj20332k), 2011-01-01
Supplement: c1nj20332k.pdf [file c1nj20332k.pdf]

## **Electronic Supplementary Information**

*Short descriptive title*: The propagation of the thermal spin transition of Fe(btr)\_ videos 1-17

### **Video legends:**

Videos 1, 2: The spin transition of a set of bare batch crystals of Fe-btr, on cooling at 0.5 K/min; on heating at 0.5 K/min (Figure 3).

Videos 3, 4: The spin transition of a second set of bare batch crystals of Fe-btr, in isothermal conditions after cooling at 0.2 K/min; on heating at 0.2 K/min (Figure 4).

Videos 5, 6: Dehydration of batch crystals of Fe-btr, at room temperature, under vacuum (Figure 6).

Videos 7-10: Repeated spin transition of a bare batch crystal of Fe-btr, embedded in oil, in isothermal conditions after cooling or heating at 0.2 K/min.

Videos 11, 12: The spin transition of a crystal of Fe-btr, selected from the batch, embedded in oil, in isothermal conditions after cooling at 0.2 K/min; on heating at 0.2 K/min (Figure 7a).

Video 13: The spin transition of another crystal of Fe-btr, selected from the batch, embedded in oil, in isothermal conditions after cooling at 0.2 K/min (Figure 7b).

Videos 14, 15: The spin transition of a carefully grown crystal of Fe-btr, embedded in oil, in isothermal conditions after cooling at 0.2 K/min; on heating at 0.2 K/min (Figure 7c).

Video 16: The spin transition of a third crystal of Fe-btr, selected from the batch, embedded in oil, in isothermal conditions after cooling at 0.2 K/min (Figure 7d).

Video 17: The spin transition of a further bare crystal of Fe-btr, selected from the batch, in isothermal conditions after cooling at 0.2 K/min (Figure 7e).

**Table of video files**

| Video | Figure | Crystal type<br>bare / in oil       | Thermal mode |                     | Video<br>time | Real<br>time | Speed<br>factor(*) |
|-------|--------|-------------------------------------|--------------|---------------------|---------------|--------------|--------------------|
|       |        |                                     | 0.2 K/min    | isothermal<br>stage |               |              |                    |
| 1     | 3      | batch, bare                         | cooling (**) | -                   | 13 s          | 10 min       | variable           |
| 2     |        |                                     | heating (**) | -                   | 14 s          | 13 min       | variable           |
| 3     | 4      | batch, bare                         | cooling      | 120 K               | 16 s          | 1 min        | × 4                |
| 4     |        |                                     | heating      | -                   | 12 s          | 40 min       | variable           |
| 5     | 6      | batch, bare<br>(vacuum)             | cooling      |                     | 22 s          | 5 min 30 s   | × 15               |
| 6     |        |                                     | heating      |                     | 22 s          | 5 min 30 s   | × 15               |
| 7     |        | B<br>batch, in oil<br>(thick layer) | cooling      | 118 K               | 16 s          | 1 min        | × 4                |
| 8     |        |                                     | heating      | 141 K               | 31 s          | 8 min        | × 15               |
| 9     |        |                                     | cooling      | 118.5 K             | 27 s          | 2 min 30 s   | × 5.5              |
| 10    |        |                                     | heating      | 140 K               | 15 s          | 3 min 20 s   | × 13               |
| 11    | 7 a    | batch, in oil                       | cooling      | 118.8 K             | 43 s          | 2 min        | × 3                |
| 12    |        |                                     | heating      | -                   | 44 s          | 10 min       | × 14               |
| 13    | 7 b    | batch, in oil                       |              | 119.5 K             | 28 s          | 3 min        | × 6                |
| 14    | 7 c    | carefully<br>grown, in oil          | cooling      | 107.9 K             | 13 s          | 1 min        | × 4.5              |
| 15    |        |                                     | heating      | -                   | 26 s          | 22 min       | × 50               |
| 16    | 7 d    | batch, in oil                       | cooling      | 119.5 K             | 37 s          | 2 min        | × 4                |
| 17    | 7 e    | batch, bare                         | cooling      | 120.7 K             | 18 s          | 1 min 30 s   | × 5                |

(\*) speed factor = real time / video time (\*\*) 0.5 K/min
